# **Preterm birth impedes structural and functional development of cerebellar Purkinje cells in the developing baboon cerebellum.**

Tara Barron and Jun Hee Kim\*

The Department of Cellular and Integrative Physiology, University of Texas Health Science Center San Antonio, Texas 78229, USA

\*Corresponding author: Jun Hee Kim, Ph.D. ([kimjh@uthscsa.edu](mailto:kimjh@uthscsa.edu))

**Key words:** Non-human primate, Baboon, Cerebellum, Fetal development, Preterm birth, Purkinje cell, Electrophysiology, NICU

## **Summary Statement**

Baboon cerebellum undergoes developmental refinements during late gestation, and NICU experience following preterm birth impacts cellular development in the cerebellum that can lead to functional deficits.

## Abstract

Human cerebellar development occurs late in gestation and is hindered by preterm birth. The fetal development of Purkinje cells, the primary output cells of the cerebellar cortex, is crucial for the structure and function of the cerebellum. However, morphological and electrophysiological features in Purkinje cells at different gestational ages, and the effects of neonatal intensive care unit (NICU) experience on cerebellar development are unexplored. Utilizing non-human primate baboon cerebellum, we investigated Purkinje cell development during the last trimester of pregnancy and the effect of NICU experience following premature birth on developmental features of Purkinje cells. Immunostaining and whole-cell patch clamp recordings of Purkinje cells in the baboon cerebellum at different gestational ages revealed that molecular layer width, driven by Purkinje dendrite extension, drastically increased and refinement of action potential waveform properties occurred throughout the last trimester of pregnancy. Preterm birth followed by NICU experience for 2 weeks impeded development of Purkinje cells, including action potential waveform properties, synaptic input, and dendrite extension compared with age-matched controls. In addition, these alterations impact Purkinje cell output, reducing the spontaneous firing frequency in deep cerebellar nucleus (DCN) neurons. Taken together, primate cerebellum undergoes developmental refinements during late gestation, and NICU experience following preterm birth alters morphological and physiological features in the cerebellum that can lead to functional deficits.

## Introduction

Preterm birth is prevalent even in developed countries, as nearly 10 % of infants were born preterm in the US in 2017 (Martin et al., 2018). After pre-term birth, infants continue their development in the highly stimulatory environment of the neonatal intensive care unit (NICU), rather than protected in the womb. Although survival of preterm infants has increased due to improved treatment in the NICU, preterm birth still results in deficits in neurodevelopment, leading to long-term disabilities. The cerebellum is a brain region that is severely impacted by preterm birth, likely due to its development late in gestation, when preterm birth occurs (Limperopoulos et al., 2005a). Individuals prematurely born have been shown the reduction in cerebellar size associated with hemorrhage (Limperopoulos et al., 2005b), infarction (Mercuri et al., 1997), or commonly underdevelopment (Allin et al., 2001; Messerschmidt et al., 2005; Volpe, 2009). Reduced cerebellar size caused by preterm birth can lead to cognitive, neuropsychological, and motor function deficits (Allin et al., 2001; Parker et al., 2008) and can persist into adulthood (Parker et al., 2008).

The largest contributor to cerebellar volume is the proliferation and migration of cells from the external granule layer (EGL; Volpe, 2009). Granule cells migrate from the EGL to internal granule layer (IGL) during development, creating parallel fibers that synapse onto Purkinje cells. This input is critical for Purkinje cell development and survival, as the absence of granule cells resulted in reduced Purkinje cell differentiation and increased Purkinje cell death (Morrison & Mason, 1998). Purkinje neurons are the sole output cells of the cerebellar cortex, sending their axons through the IGL and white matter to synapse onto the deep cerebellar nucleus (DCN). Studies have shown that alterations to Purkinje cell input to DCN cells result in changes in DCN cell activity (Telgkamp & Raman, 2002; Person & Raman, 2012; Barron et al., 2018). Thus,

studying Purkinje cell development throughout late gestation is important for understanding deficits in cerebellar growth in preterm infants.

The electrophysiological and morphological development of Purkinje cells has been studied in rodents, species in which cerebellar development occurs primarily postnatally (McKay & Turner, 2005). A histological analysis of postmortem human neonate tissue after preterm birth showed that preterm birth and ex-utero effects altered granule cells and Bergmann glia differentiation in the cerebellum (Haldipur et al., 2011). In humans and other primates, however, it remains to be elucidated whether gestational age at delivery and NICU experience individually or collectively affect proper development of the cerebellum, specifically morphological and physiological properties of Purkinje cells. Using immunostaining and electrophysiology in baboon neonates, we investigate Purkinje cell development at three timepoints throughout the last trimester of pregnancy: extreme preterm (hereafter E-Pre; 70% of gestational age, GA), moderate preterm (hereafter M-Pre; 80% of GA), and full term (hereafter Term). Furthermore, this study demonstrates that 2 weeks NICU experience after E-Pre birth (hereafter NICU) impedes cellular development of Purkinje cells.

## Results

### **Morphological development of the cerebellum occurs during late gestation and in the NICU.**

Studying the baboon neonate brain thus allows direct comparisons with the human brain because the connectivity, size, and functional areas are similar to those in humans. The premature baboon, delivered at 126 days GA or 140 days GA (term = 180 days GA), shares a similar neonatal course with the human preterm birth at 26-28 weeks (70% of GA, E-Pre) or 32 week of GA (80% of GA, M-Pre, **Figure 1A**), exhibiting common complications relevant to prematurity including

incomplete lung development and metabolism (Blanco et al., 2013). During the last trimester of pregnancy, the cerebellum became a larger size of overall structures with an increased surface area and folial complexity as described in human cerebellum (Vope, 2009; Haldipur et al., 2019; **Figure 1B**).

Granule cells influence structural and functional development and maturation of Purkinje cells (Morrison & Mason 1998), which occurs during late gestation in primates. Granule cells migrate from the external granule layer (EGL) to the internal granule layer (IGL) throughout gestation and early infancy, during which time they create parallel fibers that synapse onto Purkinje neurons (Volpe, 2009). We assessed whether the EGL and IGL were altered throughout late gestation in baboon. Labelling cells with DAPI and calbindin clearly revealed the EGL and IGL in the cerebellar cortex throughout perinatal development (**Figure 1C, Supplementary data 1**). EGL width was significantly reduced to  $32.46 \pm 1.08 \mu\text{m}$  in the Term animals compared to earlier gestational time points (E-Pre and M-Pre), but there was no difference between E-Pre and M-Pre neonates ( $55.92 \pm 3.71 \mu\text{m}$  in E-Pre,  $54.32 \pm 5.56 \mu\text{m}$  in M-Pre;  $n = 6$  slices from 3 animals in each condition;  $p = 0.0006$ , one-way ANOVA, Tukey post hoc; **Figure 1D**). Similarly, cell density in the EGL was significantly decreased in the Term condition ( $n = 6$  slices from 3 animals in each condition;  $p = 0.0028$ , one-way ANOVA, Tukey post hoc; **Supplementary data 1**). In humans, drastic reduction in EGL width and cell density occurs after birth (through postnatal 4 months, Haldipur et al., 2011), while EGL refinement occurred between M-Pre and Term in utero in the baboon cerebellum. In this period, IGL width was increased from  $147.4 \pm 7.07 \mu\text{m}$  in E-Pre to  $222.3 \pm 11.48 \mu\text{m}$  in M-Pre and  $213.2 \pm 25.02 \mu\text{m}$  in Term neonates ( $n = 6$  slices from 3 animals in each condition;  $p = 0.0125$ , one-way ANOVA, Tukey post hoc; **Supplementary data 1**). IGL cell density was constant throughout gestation in the E-Pre, M-Pre, and Term animals ( $n = 6$  slices

from 3 animals in each condition;  $p = 0.0877$ , one-way ANOVA, Tukey post hoc; **Supplementary data 1**). Notably, these data indicate that granule cells actively migrate from the EGL to the IGL after the M-Pre time point during the last trimester, and the IGL progressively develops throughout the last trimester during normal gestational development.

Purkinje cells were identified by their expression of calbindin, a calcium-binding protein that is not expressed by other cells in the cerebellum (**Figure 1C**). The dendritic tree of Purkinje cells extends through the molecular layer (ML), and thus determines ML width. ML width was  $40.71 \pm 2.74 \mu\text{m}$  in E-Pre animals, and increased throughout development to ultimately become  $162.4 \pm 7.00 \mu\text{m}$  in Term animals ( $n = 6$  slices from 3 animals from each condition;  $p < 0.0001$ , one-way ANOVA, Tukey post hoc; **Figure 1E**). The density of Purkinje cells did not significantly change throughout gestational development from EP to Term ( $n = 6$  slices from 3 animals from each condition;  $p = 0.48$ , one-way ANOVA; **Figure 1F**). The soma diameter of Purkinje cells was increased to  $24.73 \pm 0.79$  in Term animals compared to earlier gestational ages (from  $20.41 \pm 0.73$  in E-Pre and  $19.89 \pm 0.57$  in M-Pre;  $n = 18$  cells from 3 E-Pre animals, 24 cells from 3 M-Pre animals, and 21 cells from 3 Term animals;  $P < 0.0001$ , one-way ANOVA, Tukey post hoc; **Figure 1G**). The results suggest that the soma and dendrites of Purkinje cells are developed during the last trimester without changes in Purkinje cell density.

### **Preterm birth followed by NICU experience impacts morphological Purkinje cell development.**

Next, we examined how premature birth and NICU experience impacts morphological features of Purkinje cell development. There were no significant effects of NICU experience on EGL and IGL development in the baboon cerebellum (**Supplementary data 1**). While ML width

was increased throughout the last trimester of pregnancy, it was thinner in NICU-experienced neonates compared to age-matched M-Pre controls ( $61.5 \pm 2.61 \mu\text{m}$ ,  $n = 6$  slices from 3 NICU animals, vs  $91.9 \pm 7.73 \mu\text{m}$ ,  $n=5$  slices from 3 M-Pre animals,  $p < 0.01$ , Tukey post hoc; **Figure 1E**), indicating alteration in dendritic development of Purkinje cells in the NICU-experienced group. However, NICU experience did not impact soma size ( $n = 18$  cells from 4 NICU animals) or density of Purkinje cells ( $n = 6$  slices from 3 NICU animals) compared to age-matched M-Pre controls ( $p>0.05$ , one-way ANOVA, Tukey post hoc). Taken together, the results indicate that Purkinje cells undergo significant development in their morphological features including somatic size and dendrites in the last trimester of the pregnancy, and premature birth and NICU experience may impair or delay dendrite extension of Purkinje cells in the developing baboon cerebellum.

### **NICU experience influences the late-gestation refinement of intrinsic electrophysiological properties of Purkinje cells.**

Next, we examined how morphological development impacts physiological properties of Purkinje cells during perinatal development. In whole-cell patch clamp recordings, a prolonged depolarizing current injection (200 pA for 200 ms) resulted in action potentials (APs) in Purkinje cells from baboon neonates at different gestational ages (**Figure 2A**). Notably, Purkinje cell APs from term baboon neonates showed a strong adaption of AP firing whereas APs from E-Pre and M-Pre did not show a distinct adaption. The number of APs elicited by the same current injection (from 50 pA to 200 pA for 200 ms) was reduced in Purkinje cells from baboon neonates throughout perinatal development ( $n = 12$  cells from 5 E-Pre animals, 8 cells from 4 M-Pre animals, and 3 cells from 3 Term animals;  $p < 0.0001$ , two-way ANOVA; **Figure 2B**). The NICU group showed a significant reduction of spikes compared with E-Pre ( $n = 9$  cells from 6 NICU animals;  $p <$

0.0001; Tukey post hoc), but no significant difference from M-Pre and Term Purkinje cells. The inter-spike interval (ISI), measured by the time difference between the peaks of the first and second APs, was not significantly changed during fetal development from E-Pre to Term neonates and in NICU-experienced neonates (n = 12 cells from 5 E-Pre animals, 7 cells from 4 M-Pre animals, 3 cells from 3 Term animals, and 9 cells from 6 NICU animals;  $p=0.5514$ , One-way ANOVA; **Figure 2C**). Rheobase, the minimum amount of current necessary to induce an AP in Purkinje cells, increased throughout perinatal development, from  $35.83 \pm 4.68$  pA in E-Pre animals to  $120.0 \pm 15.28$  pA in Term animals (n = 12 cells from 5 E-Pre animals, 8 cells from 4 M-Pre animals, and 3 cells from 3 Term animals;  $p < 0.0001$ , one-way ANOVA; **Figure 2D**). In the NICU, Rheobase from Purkinje cells was between those from E-Pre and M-Pre, and was significantly smaller than those in M-Pre animals (n = 8 cells from 4 M-Pre animals and 9 cells from 6 NICU animals;  $p = 0.0272$ , Mann-Whitney test).

Individual APs from different gestational ages were also analyzed (**Figure 2A**, insets). Threshold, amplitude, and halfwidth were measured using phase plots of each AP, the plot of  $dV/dt$  against membrane potential (**Figure 2E**). There was no significant change in AP threshold (n = 12 cells from 5 E-Pre animals, 8 cells from 4 M-Pre animals, and 3 cells from 3 Term animals;  $p = 0.1222$ , one-way ANOVA; **Figure 2F**) or amplitude throughout development (n = 12 cells from 5 E-Pre animals, 8 cells from 4 M-Pre animals, and 3 cells from 3 Term animals;  $p = 0.6488$ , one-way ANOVA; **Figure 2G**). There was, however, a decrease in AP halfwidth from  $1.13 \pm 0.08$  ms in E-Pre animals to  $0.44 \pm 0.05$  ms in Term animals (n = 12 cells from 5 E-Pre animals, 8 cells from 4 M-Pre animals, and 3 cells from 3 Term animals;  $p = 0.0081$ , one-way ANOVA; **Figure 2H**), indicating that aspects of Purkinje cell AP waveform are significantly modified during the third trimester of the pregnancy. In addition, we examined how NICU experience impacts AP



properties of Purkinje cells. There was no significant effect on AP waveform in NICU animals in terms of threshold, amplitude, or halfwidth compared with age-matched M-Pre animals ( $n = 9$  cells from 6 NICU animals). Taken together, Purkinje cells undergo fine-tuning of spiking properties throughout the last gestational period, and NICU experience may alter or delay some developmental features, including AP attenuation and rheobase.

### **Synaptic input to Purkinje cells is increased throughout development and impeded by NICU experience.**

During gestational development of the cerebellum, a key event is migration of granule cells from EGL to IGL, during which time they form synapses onto Purkinje cells (Volpe, 2009). Morphological and physiological development of Purkinje cells may be regulated by synaptic input from granule cells (Morrison & Mason, 1998). Therefore, we examined how synaptic inputs to Purkinje cells are changed throughout the later gestational development by recording spontaneous postsynaptic currents (sPSCs; **Figure 3A**). sPSCs in E-Pre animals had amplitudes of  $24.68 \pm 2.64$  pA and were completely blocked by CNQX, an AMPA receptor antagonist, indicating that these synaptic currents were AMPA receptor-mediated excitatory synaptic currents. sPSC amplitude was not significantly changed throughout development ( $n = 14$  cells from 5 E-Pre animals, 9 cells from 4 M-Pre animals, and 3 cells from 2 Term animals;  $p = 0.9706$ , one-way ANOVA; **Figure 3B**). However, sPSC frequency increased throughout development, from  $1.04 \pm 0.23$  Hz at E-Pre to  $6.08 \pm 2.063$  Hz in Term animals ( $n = 14$  cells from 5 E-Pre animals and 3 cells from 2 Term animals;  $p = 0.0002$ , one-way ANOVA, Tukey post hoc; **Figure 3C**), indicating that there is an increase in synaptic inputs in the later gestational period. sPSC frequency increased to  $2.54 \pm 0.26$  Hz in M-Pre ( $n = 9$  cells from 4 M-Pre animals), but did not increase in NICU (0.99

$\pm 0.26$  Hz;  $n = 7$  cells from 5 NICU animals). Thus, there was significant reduction in sPSC frequency in NICU compared with age-matched M-Pre ( $p=0.0443$ , Mann-Whitney test). This suggests that synaptic inputs to Purkinje cells are not properly developed during NICU experience following premature birth, which may influence the structural and functional development of Purkinje cells.

### **DCN neurons of NICU-experienced animals have altered AP firing properties.**

Purkinje cells are the sole output of the cerebellar cortex, integrating all signals within the cerebellar cortex and relaying the information to the DCN. Alterations in spiking properties and synaptic inputs to Purkinje cells in NICU-experienced neonates can therefore impact DCN neuronal activity (Telgkamp & Raman, 2002; Person & Raman, 2012). To examine how NICU experience impacts downstream signaling in the cerebellar circuitry, we recorded cells of the DCN using whole-cell patch clamp electrophysiology. DCN neurons in E-Pre, NICU, and M-Pre baboon neonates displayed spontaneous AP firing (**Figure 4A**). While frequency of spontaneous AP firing was not changed between E-Pre and M-Pre neonates, it was significantly increased in NICU ( $n = 4$  cells from 3 E-Pre animals, 6 cells from 3 NICU animals, and 4 cells from 3 M-Pre animals;  $p = 0.0426$ , one-way ANOVA, Tukey post hoc; **Figure 4B**). The frequency of spontaneous spikes in DCN neurons is affected by inhibitory GABAergic input from Purkinje cells (Barron et al., 2018). Thus, this hyperexcitability could be due to reduced inhibitory input from Purkinje cells. Additionally, intrinsic AP firing properties of DCN cells were assessed when the cells were depolarized via a current injection of 200 pA for 200 ms, resulting in a train of APs (**Figure 4C**). The number of APs elicited by the depolarization did not change between E-Pre, M-Pre, and NICU animals ( $n = 4$  cells from 2 E-Pre animals, 7 cells from 4 NICU animals, and 4 cells from 3 M-Pre

animals;  $p = 0.7825$ , one-way ANOVA; **Figure 4D**). There was no change in ISI during development or NICU experience ( $n = 4$  cells from 2 E-Pre animals, 7 cells from 4 NICU animals, and 4 cells from 3 M-Pre animals;  $p = 0.4762$ , one-way ANOVA; **Figure 4E**), and rheobase was also not changed in the E-Pre, M-Pre, and NICU conditions ( $n = 4$  cells from 2 E-Pre animals, 7 cells from 4 NICU animals, and 4 cells from 3 M-Pre animals;  $p = 0.6197$ , one-way ANOVA; **Figure 4F**). Individual APs from DCN cells were also analyzed (**Figure 4C**, insets). There was no significant change in AP threshold between E-Pre, M-Pre, and NICU animals ( $n = 4$  cells from 2 E-Pre animals, 7 cells from 4 NICU animals, and 4 cells from 3 M-Pre animals;  $p = 0.9593$ , one-way ANOVA; **Figure 4G**). AP amplitude did not significantly change between E-Pre and M-Pre, but was significantly reduced in NICU compared to age-matched controls ( $n = 4$  cells from 2 E-Pre animals, 7 cells from 4 NICU animals;  $p = 0.0301$ , one-way ANOVA, Tukey post hoc; **Figure 4H**). Similarly, there was no significant difference in AP halfwidth between E-Pre and M-Pre DCN cells, but there was an increase in AP halfwidth in NICU DCN cells compared to M-Pre cells ( $n = 4$  cells from 2 E-Pre animals, 7 cells from 4 NICU animals, and 4 cells from 3 M-Pre animals;  $p = 0.0129$ , one-way ANOVA, Tukey post hoc; **Figure 4I**). This change in AP halfwidth is not likely to contribute to the increase in spontaneous AP firing frequency increase seen in NICU DCN cells, as increased AP halfwidth is typically associated with a decrease in the ability of cells to fire high frequency APs. Thus, the hyperexcitability of DCN cells seen in the NICU as measured by spontaneous AP firing is not due to changes in intrinsic properties, but rather that Purkinje cell output to the DCN may be the primary factor influencing DCN hyperexcitability.

## Discussion

Although preterm birth is still common worldwide, its effects on the cellular physiology of the central nervous system have been understudied. Cerebellar Purkinje cells are specifically susceptible to developmental disruptions, as the cerebellum is a late-developing brain structure that is critically impacted by preterm birth. The present study demonstrates that Purkinje cell structure and function are drastically developed during the last trimester of the pregnancy and NICU experience impedes development features in a baboon model of preterm birth. Alterations in Purkinje cell dendrite extension and action potential waveform in the NICU-experienced neonates are associated with reduced excitatory synaptic input from granule cells and DCN hyperexcitability.

The findings in baboon cerebellum at different gestational ages compare to postnatal development of Purkinje cells in rodent models. The morphology of rat Purkinje cells at postnatal day 6 (P6)-P9 and P12 resemble baboon Purkinje cells at the E-Pre and M-Pre stages, respectively, with increasing extension and ramification of processes through P30 (McKay & Turner, 2005), similar to the third trimester of the gestational development of baboon Purkinje cells through full term birth. In baboon cerebellum, the most prominent morphological feature of Purkinje cell development during the third trimester of gestation was an increase in dendritic size and complexity, resulting in an increase of ML width (**Fig. 1**). The developmental course of morphological features is comparable to P6 to P30 in rat cerebellum; however, comparison of electrophysiological properties of Purkinje cells are more variable. While the threshold and amplitude of action potentials remained stable, rheobase significantly increased throughout late gestational development in baboon Purkinje cells, similar to the observed Purkinje cell rheobase from in P9 to P30 rats (McKay & Turner, 2005). In rat Purkinje cells, one signature physiological

feature during early postnatal development is an emergence of repetitive bursts of spikes and an increase in spike frequency (McKay & Turner, 2005). In baboon Purkinje cells, action potential half-width was drastically reduced and the inter-spike-interval showed a trend of reduction throughout late gestation, indicating that Purkinje cells undergo drastic changes in morphology and physiological properties during the last trimester in utero. We would like to state that there were limitations in obtaining a number of intact and acute baboon brain slices at different gestational time points for electrophysiological recordings. Although ISI and threshold showed a developmental trend, there was no significant difference. Thus, it is worthy to examine physiological properties of Purkinje cells at more variable GA from M-Pre and Term neonates.

The comparison of Purkinje cell development between species highlights the importance of studying brain development in primates, which is similar to that of humans in that it occurs primarily during gestation, as opposed to postnatally, as in rodents. For example, the human Purkinje dendritic arbor continues to develop its characteristic shape after birth (Zecevic & Rakic, 1976; Haldipur et al 2012; Haldipur et al., 2019), which corroborates the marked arborization seen at term birth compared to earlier time points in the baboon. The first synapses on somatic spines of Purkinje cells become prominent at 18 to 24 weeks of gestation in humans, before the arborization of the Purkinje dendrites (Zecevic & Rakic, 1976). Similar to baboon, Purkinje arborization was associated with an increase in ML width in late gestation and early postnatal stages in humans (Haldipur et al., 2011). A histological analysis of postmortem human neonate tissue after preterm birth showed that EGL cell density and thickness were altered by preterm birth and ex-utero effects whereas ML thickness are not affected (Haldipur et al., 2011). In baboon neonates, we found that preterm birth and NICU experience impact ML thickness without significant changes in EGL width and cell density. This contrast could be due to the time for

collecting tissues. Cerebellar tissues from human studies are variable in their gestational or postnatal time points. In the human cerebellum, ML thickness was stable during late gestation and dramatically increased after term birth (> 39 weeks GA, Haldipur et al., 2011), whereas baboon cerebellum displayed a significant increase in ML thickness from E-Pre to M-Pre and Term neonates (**Fig. 1**). Therefore, preterm birth and NICU experience may more strongly influence Purkinje dendritic development and ML thickness in baboon cerebellum than in human. In human, preterm birth and ex-utero effects impact EGL and IGL thickness and cell density indicating altered migration of granule cells from the EGL to IGL (Haldipur et al., 2011). In baboon cerebellar development, EGL thickness and cell density were significantly changed in M-Pre neonates (delivered at 80% of GA) and Term neonates. Thus, it is expected that NICU experience between M-Pre and Term may critically impact EGL thickness and cell density in baboon.

The present study defines the increase in synaptic input from granule cells to Purkinje cells throughout development, as well as the impedance of this synaptic input following NICU experience. The relationship between Purkinje cells and granule cells migrating from the EGL to IGL are crucial for their reciprocal development. Granule cell neurons are critical for the development and survival of Purkinje cells (Altman & Anderson, 1972; Rakic & Sidman, 1973). Conversely, Purkinje cells release Sonic hedgehog, which signals through Gli1 and Gli2 on EGL cells to influence granule cell development, as neutralization of Sonic hedgehog results in a reduced EGL cell proliferation (Wallace, 1999, Haldipur et al., 2012). Therefore, premature birth and NICU experience could influence the reciprocal development of EGL, IGL, and ML resulting in cerebellar volume reduction.

Mechanisms of reduced cerebellar size due to preterm birth generally include subarachnoid hemorrhage or hypoxia. Cerebellar volume has shown to be reduced in a neonatal mouse model of

cerebellar hemorrhage (Tremblay et al., 2017). In infants born preterm, blood over the cerebellum due to subarachnoid hemorrhage, accompanied by hemosiderin deposition, has been shown to result in reduced cerebellar volume (Messerschmidt et al., 2008; Tam et al., 2011) and potentially direct effects on Purkinje cells in preterm newborns, as discussed by Volpe (2009). Hypoxemia in fetal sheep resulted in a reduced number of Purkinje cells (Rees et al., 1997; Mallard et al., 1998), and chronic hypoxia in neonatal mice resulted in altered Purkinje cell structure and function locomotor deficits (Zonouzi et al., 2015; Sathyanesan et al., 2018). In the present study, preterm baboon neonates were born via c-section without any perinatal complications. We must take careful consideration to compare baboon neonate tissue and human postmortem tissue, which may have the possibility of pre-existing complications and potential abnormalities beyond premature birth. Additionally, there may be influences on cerebellar structure and function that are impacted by environmental aspects of NICU experience rather than preterm birth itself (Noguchi et al., 2008). In this study, NICU-experienced baboon neonates were treated with all medications, hormones, and nutrients, which were administered in the NICU to support viability, similar to what is administered to preterm human infants. The effects of these on cerebellar development are yet to be determined and could confound the results of this study.

Preterm birth in humans has been shown severely disrupt cerebellar development, associated with long-term deficits in cognition and motor function (Allin et al., 2001), as well as neuropsychological well-being (Parker et al., 2008). However, the cellular functional deficits in the cerebellum due to preterm birth are poorly understood. The present study using non-human primate baboon neonates, with controlled conditions and environments, are critical for understanding neurodevelopment at discrete time points during gestation and the effects of preterm birth. We demonstrate functional changes in critical cellular players in the cerebellar circuit in the

preterm baboon, including reduced excitatory input to Purkinje cells from granule cells accompanying deficits in Purkinje cell physiology and DCN cell output. This work provides insight into the cellular physiology that may contribute to cerebellar-related deficits resulting from preterm birth.

## **Materials and Methods**

### **Animals.**

A total of 22 brains from baboons of either sex were delivered at the Texas Biomedical Research Institute in San Antonio. Animals were used in accordance with approved University of Texas Health Science Center, San Antonio Institutional Animal Care and Use Committee protocols. E-Pre baboons were delivered via cesarean section at  $125 \pm 2$  d gestational age (67% of gestation). 5 of these E-Pre baboons were immediately euthanized to constitute the E-Pre group, while 10 were intubated immediately after birth and chronically ventilated for a planned survival of 14 d in the NICU to constitute the NICU group. NICU baboon care has been described in detail (Blanco et al., 2013). Briefly, central intravenous lines were placed shortly after birth for fluid management and parenteral nutrition, and baboons were treated with corticosteroids, antibiotics, ketamine, valium, vitamin K, and blood transfusions. 4 M-Pre baboons were delivered via cesarean section at  $140 \pm 2$  d gestational age (76% of gestation). 3 term baboons were delivered naturally at approximately 185 d gestational age.

### **Slice preparation.**

During neonatal baboon necropsy, the cerebellum was removed from the skull and immersed in ice-cold artificial CSF (aCSF) containing the following (in mM): 125 NaCl, 2.5 KCl,



3 MgCl<sub>2</sub>, 0.1 CaCl<sub>2</sub>, 25 glucose, 25 NaHCO<sub>3</sub>, 1.25 NaH<sub>2</sub>PO<sub>4</sub>, 0.4 ascorbic acid, 3 myo-inositol, and 2 Na-pyruvate, pH 7.3–7.4, when bubbled with carbogen (95% O<sub>2</sub>, 5% CO<sub>2</sub>; osmolality of 310–320 mOsm/kg water). For electrophysiology, sagittal cerebellar slices (300 μm) were prepared using a vibratome (VT1200S, Leica). After cutting, the slices were transferred to an incubation chamber containing normal aCSF bubbled with carbogen and maintained at 35°C for 30 min and thereafter at room temperature. Normal aCSF was the same as the slicing aCSF, but with 1 mM MgCl<sub>2</sub> and 2 mM CaCl<sub>2</sub>. For immunohistochemistry, the cerebellum was post-fixed overnight at 4°C followed by cryoprotection with 30% (w/v) sucrose in 0.1 M PBS (pH 7.3). Sagittal cerebellar slices (80 μm) were cut with a microtome cryostat (HM 505E, Microm).

### **Electrophysiology.**

Whole-cell patch-clamp recordings were performed in normal aCSF at room temperature (22°C–24°C). Pipette solution contained the following (in mM): 130 K-gluconate, 20 KCl, 5 Na<sub>2</sub>-phosphocreatine, 10 HEPES, 0.2 EGTA, 4 Mg-ATP, and 0.3 GTP, pH adjusted to 7.3 with KOH. EPSCs or action potentials (APs) were recorded in normal aCSF using the voltage or current-clamp mode of the EPC-10 (HEKA Elektronik). Patch electrodes had resistances of 3–4 mΩ, and the initial uncompensated series resistance (R<sub>s</sub>) was <25 mΩ. APs were elicited by current injection in current-clamp mode. Postsynaptic currents were measured under whole-cell voltage-clamp with a holding potential of –65 mV. Spontaneous postsynaptic currents were analyzed using Mini-analysis software (Synptosoft Inc., Decatur, GA, USA).

### **Immunohistochemistry.**

After slicing with a cryostat, free-floating cerebellar slices (80  $\mu\text{m}$ ) were blocked in 4% goat serum and 0.3% Triton X-100 in PBS for 1 hour. Rabbit anti-calbindin (CB; 1:200; Cell Signaling Technologies, Cat # 13176) was used as a primary antibody. Staining was reported by incubation with an Alexa dye-conjugated secondary antibody (1:500, Invitrogen) for 2 hours at room temperature. After five rinses with PBS, slices were incubated with 4',6-diamidino-2-phenylindole (DAPI; 1:500, Sigma-Aldrich) to counterstain cell nuclei. Slices were mounted onto Superfrost slides in photobleaching-protective medium (Fluoroshield; Sigma-Aldrich). Stained slices were viewed using a 10 $\times$  or 20 $\times$  air objective or a 40 $\times$  oil-immersion objective on a confocal laser-scanning microscope (LSM-510, Zeiss). Stack images were acquired at a digital size of 1,024  $\times$  1,024 pixels with optical section separation (z interval) of 0.5  $\mu\text{m}$  and were later cropped to the relevant part of the field without changing the resolution.

### **Quantification.**

Layer width was measured at 15 locations throughout the layer, each 50  $\mu\text{m}$  apart, from each section. For IGL and EGL cell density quantification, DAPI+ cells were counted within a 50 $\times$ 50  $\mu\text{m}$  square in each slice. For Purkinje cell density, CB+ cell bodies were counted along a 200  $\mu\text{m}$  line in the Purkinje cell layer. For all cell counts, only cells that were in focus and completely within the square or line were counted. Purkinje cell soma size was quantified by measuring diameter of the cell.

### **Acknowledgements**

We thank Dr. Cynthia Blanco (Pediatrics, UTHSCSA) for sharing baboon tissues and providing technical assistance.

### **Competing interests**

No competing interests declared.

### **Funding**

This work was supported by a grant from the South National Primate Research Center (SNPRC) and UTHSCSA (Children's Health Pilot Program) to J. H. Kim.

### **Data availability**

All data generated or analyzed during this study are included in this published article (and its supplementary information files) and are available from the corresponding author upon reasonable request.

## References

- Allin M, Matsumoto H, Santhouse AM, Nosarti C, AlAsady MH, Stewart AL, Rifkin L, Murray RM (2001). Cognitive and motor function and the size of the cerebellum in adolescents born very pre-term. *Brain*. 124(Pt 1):60-6.
- Altman J, Anderson WJ (1972). Experimental reorganization of the cerebellar cortex. I. Morphological effects of elimination of all microneurons with prolonged x-irradiation started at birth. *J Comp Neurol*. 146(3):355-406.
- Baptista CA, Hatten ME, Blazeski R, Mason CA (1994). Cell-cell interactions influence survival and differentiation of purified Purkinje cells in vitro. *Neuron*. 12(2):243-60.
- Barron T, Saifetiarova J, Bhat MA, Kim JH (2018). Myelination of Purkinje axons is critical for resilient synaptic transmission in the deep cerebellar nucleus. *Sci Rep*. 8(1):1022.
- Blanco CL, McGill-Vargas LL, McCurnin D, Quinn AR (2013). Hyperglycemia increases the risk of death in extremely preterm baboons. *Pediatr Res*. 73(3):337-43.
- Haldipur P, Bharti U, Alberti C, Sarkar C, Gulati G, Iyengar S, Gressens P, Mani S. (2011) Preterm delivery disrupts the developmental program of the cerebellum. *PLoS One*. 2011;6(8):e23449.
- Haldipur P, Bharti U, Govindan S, Sarkar C, Iyengar S, Gressens P, Mani S (2012). Expression of Sonic Hedgehog During Cell Proliferation in the Human Cerebellum. *Stem Cells Dev*. 21(7):1059-68.
- Haldipur P, Aldinger KA, Bernardo S, Deng M, Timms AE, Overman LM, Winter C, Lisgo SN, Razavi, Silvestri E, Manganaro L, Adle-Biassette H, Guimiot F, Russo R, Kidron D, Hof PR, Gerrelli D, Lindsay SJ, Dobyns WB, Glass IA, Alexandre P, Millen KJ (2019). Spatiotemporal expansion of primary progenitor zones in the developing human cerebellum. *Science*. 366(6464):454-460.

- Hirai H, Launey T (2000). The regulatory connection between the activity of granule cell NMDA receptors and dendritic differentiation of cerebellar Purkinje cells. *J Neurosci.* 20(14):5217-24.
- Limperopoulos C, Soul JS, Gauvreau K, Huppi PS, Warfield SK, Bassan H, Robertson RL, Volpe JJ, du Plessis AJ (2005a). Late gestation cerebellar growth is rapid and impeded by premature birth. *Pediatrics.* 115(3):688-95.
- Limperopoulos C, Benson CB, Bassan H, Disalvo DN, Kinnamon DD, Moore M, Ringer SA, Volpe JJ, du Plessis AJ (2005b). Cerebellar hemorrhage in the preterm infant: ultrasonographic findings and risk factors. *Pediatrics.* 116(3):717-24.
- Mallard EC, Rees S, Stringer M, Cock ML, Harding R (1998). Effects of chronic placental insufficiency on brain development in fetal sheep. *Pediatr Res.* 43(2):262-70.
- Martin JA, Hamilton BE, Osterman MJK, Driscoll AK, Drake P (2018). Births: final data for 2017. *Natl Vital Stat Rep.* 67(8):1-50.
- McKay BE, Turner RW (2005). Physiological and morphological development of the rat cerebellar Purkinje cell. *J Physiol.* 567(3):829-50.
- Mercuri E, He J, Curati WL, Dubowitz LM, Cowan FM, Bydder GM (1997). Cerebellar infarction and atrophy in infants and children with a history of premature birth. *Pediatr Radiol.* 27(2):139-43.
- Messerschmidt A, Brugger PC, Boltshauser E, Zoder G, Sterniste W, Birnbacher R, Prayer D (2005). Disruption of cerebellar development: potential complication of extreme prematurity. *AJNR Am J Neuroradiol.* 26(7):1659-67.
- Messerschmidt A, Prayer D, Brugger PC, Boltshauser E, Zoder G, Sterniste W, Pollak A, Weber M, Birnbacher R (2008). Preterm birth and disruptive cerebellar development: assessment of perinatal risk factors. *Eur J Paediatr Neurol.* 12(6):455-60.

- Morrison ME, Mason CA (1998). Granule neuron regulation of Purkinje cell development: striking a balance between neurotrophin and glutamate signaling. *J Neurosci.* 18(10):3563-73.
- Noguchi KK, Walls KC, Wozniak DF, Olney JW, Roth KA, Farber NB (2008). Acute neonatal glucocorticoid exposure produces selective and rapid cerebellar neural progenitor cell apoptotic death. *Cell Death Differ.* 15(10): 1582–1592.
- Parker J, Mitchell A, Kalpakidou A, Walshe M, Jung HY, Nosarti C, Santosh P, Rifkin L, Wyatt J, Murray RM, Allin M (2008). Cerebellar growth and behavioural & neuropsychological outcome in preterm adolescents. *Brain.* 131(Pt 5):1344-51.
- Person AL, Raman IM (2012). Purkinje neuron synchrony elicits time-locked spiking in the cerebellar nuclei. *Nature.* 481(7382): 502–505.
- Rakic P, Sidman RL (1973). Organization of cerebellar cortex secondary to deficit of granule cells in weaver mutant mice. *J Comp Neurol.* 152(2):133-61.
- Rees S, Stringer M, Just Y, Hooper SB, Harding R (1997). The vulnerability of the fetal sheep brain to hypoxemia at mid-gestation. *Brain Res Dev Brain Res.* 103(2):103-18.
- Sathyanesan A, Kundu S, Abbah J, Gallo V (2018). Neonatal brain injury causes cerebellar learning deficits and Purkinje cell dysfunction. *Nat Commun.* 9(1):3235.
- Tam EW, Miller SP, Studholme C, Chau V, Glidden D, Poskitt KJ, Ferriero DM, Barkovich AJ (2011). Differential effects of intraventricular hemorrhage and white matter injury on preterm cerebellar growth. *J Pediatr.* 158(3):366-71.
- Telgkamp P, Raman IM (2002). Depression of inhibitory synaptic transmission between Purkinje cells and neurons of the cerebellar nuclei. *J Neurosci.* 22(19):8447-57.

- Tremblay S, Pai A, Richter L, Vafaei R, Potluri P, Ellegood J, Lerch JP, Goldowitz D (2017). Systemic inflammation combined with neonatal cerebellar haemorrhage aggravates long-term structural and functional outcomes in a mouse model. *Brain Behav Immun*. 66:257-276.
- Volpe JJ (2009). Cerebellum of the premature infant: rapidly developing, vulnerable, clinically important. *J Child Neurol*. 24(9):1085-104.
- Wallace VA (1999). Purkinje-cell-derived Sonic hedgehog regulates granule neuron precursor cell proliferation in the developing mouse cerebellum. *Curr Biol*. (9)8:445-448.
- Zecevic N, Rakic P (1976). Differentiation of Purkinje Cells and Their Relationship to Other Components of Developing Cerebellar Cortex in Man. *J Comp Neurol*. 167(1):27-47.
- Zonouzi M, Scafidi J, Li P, McEllin B, Edwards J, Dupree JL, Harvey L, Sun D, Hübner CA, Cull-Candy SG, Farrant M, Gallo V (2015). GABAergic regulation of cerebellar NG2 cell development is altered in perinatal white matter injury. *Nat Neurosci*. 18(5):674-82.

**Figure 1. Morphological development of baboon cerebellum during the last trimester of the pregnancy.** **A.** Experimental paradigm comparing baboon gestational age (GA) compared to human GA. **B.** Cerebellar sections from E-Pre, M-Pre, Term, and NICU animals immunostained to show Purkinje cell bodies, dendrites, and axons expressing calbindin (CB, green). **C.** Granule cell nuclei stained with DAPI (red) in the external granule layer (EGL) and internal granule layer (IGL), with CB labeling of Purkinje dendrites in the molecular layer (ML) and Purkinje cell bodies in the Purkinje layer (PL) in E-Pre, M-Pre, Term, and NICU cerebellar sections. **D-G.** Summary of EGL width (**D**), ML width (**E**), Purkinje cell density (**F**), and Purkinje cell soma diameter (**G**) at each gestational age. Data are represented as  $\pm$  SEM. \*, \*\*, and \*\*\* represent  $p < 0.05$ ,  $p < 0.01$ , and  $p < 0.001$ , respectively.

**Figure 2. Purkinje cell intrinsic properties are altered in the NICU condition.** **A.** Top, confocal images of Purkinje cells Alexa dye-filled during whole-cell recording. Scale = 20  $\mu$ m. Bottom, representative traces of action potentials (APs) induced by 200 pA current injections from Purkinje cells from E-Pre, M-Pre, Term, and NICU baboon neonates. Inset, expanded view of action potentials in box. **B-D.** Summary of AP number (**B**) in response to current injection from 50 to 200 pA, inter-spike interval (ISI; **C**), and rheobase (**D**) from each group. **E.** Representative phase plot of an AP ( $dV/dt$ ), demonstrating the threshold (red arrow), peak (grey line), and amplitude (voltage difference from the threshold to the peak). **F-H.** Summary of threshold (**F**), amplitude (**G**), and halfwidth (**H**) of a single AP from each gestational age. Data are represented as  $\pm$  SEM. \*, \*\*, and \*\*\* represent  $p < 0.05$ ,  $p < 0.01$ , and  $p < 0.001$ , respectively.



**Figure 3. Spontaneous EPSCs increase in frequency throughout gestation and are reduced after NICU experience.** **A.** Representative traces of spontaneous EPSCs recorded from Purkinje cells of E-Pre, M-Pre, Term, and NICU neonates. **B-C.** Summary of spontaneous EPSC amplitude (**B**) and frequency (**C**) at each group. Data are represented as  $\pm$  SEM. \* and \*\*\* represent  $p < 0.05$ , and  $p < 0.001$ , respectively.

**Figure 4. DCN cell APs are impacted by NICU experience.** **A.** Spontaneous AP recordings from DCN neurons from E-Pre, M-Pre, and NICU baboon neonates. **B.** Summary of spontaneous AP frequency in DCN neurons from each group. **C.** Representative traces of action potentials induced by 200 pA current injections from DCN neurons from E-Pre, M-Pre, and NICU animals. **D-I.** Summary of DCN neuron AP number (**D**), inter-spike interval (ISI; **E**), rheobase (**F**), threshold (**G**), amplitude (**H**), and half-width (**I**) from each group. Data are represented as  $\pm$  SEM. \*, and \*\* represent  $p < 0.05$ , and  $p < 0.01$ , respectively.

**A**

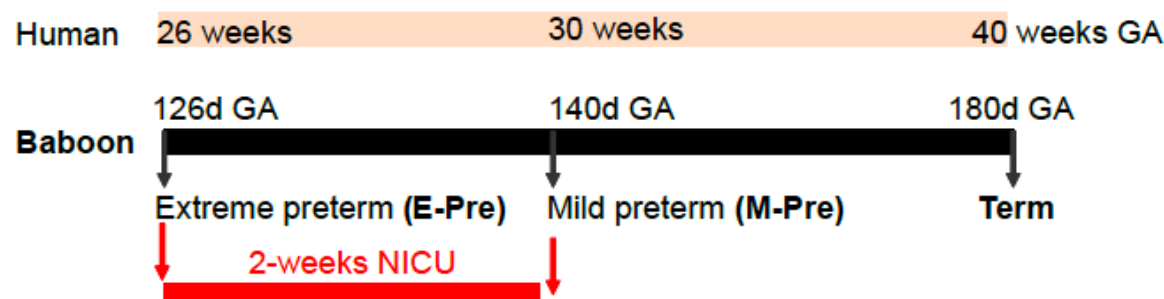

**B**

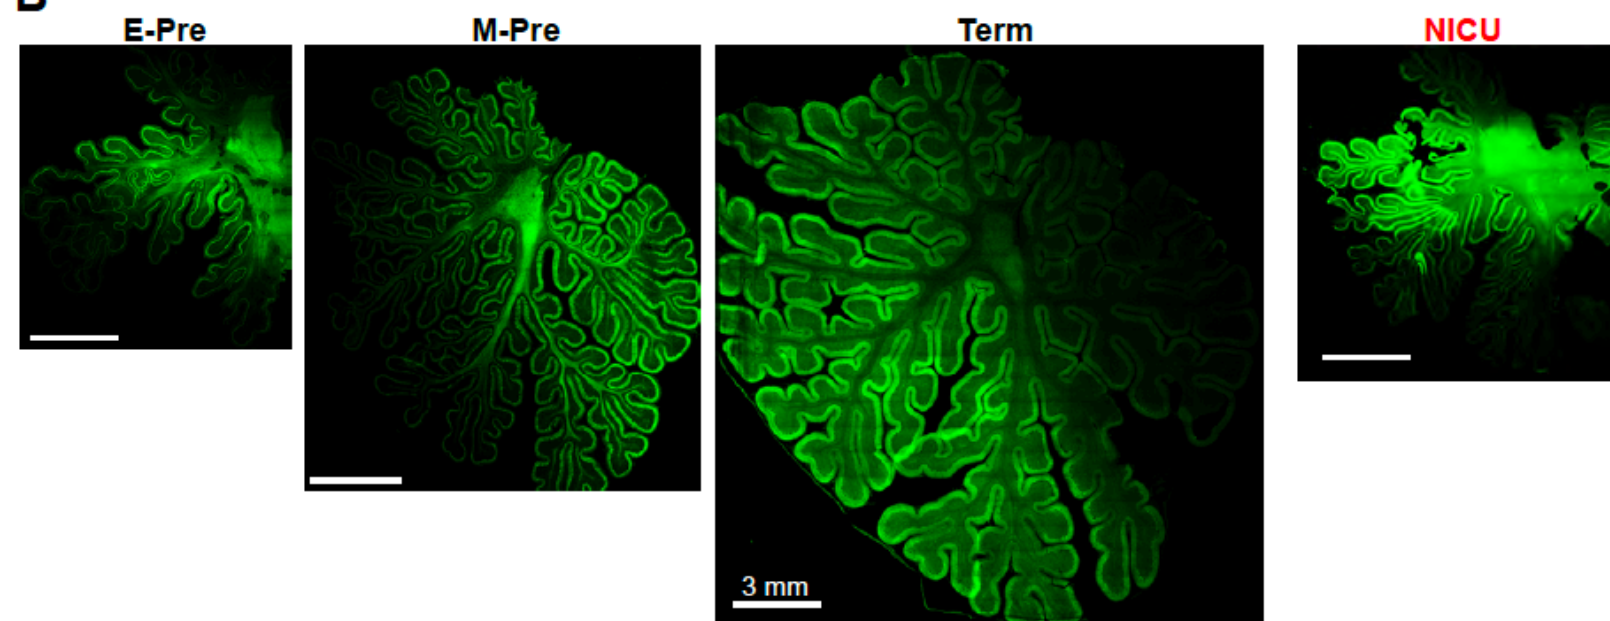

**C**

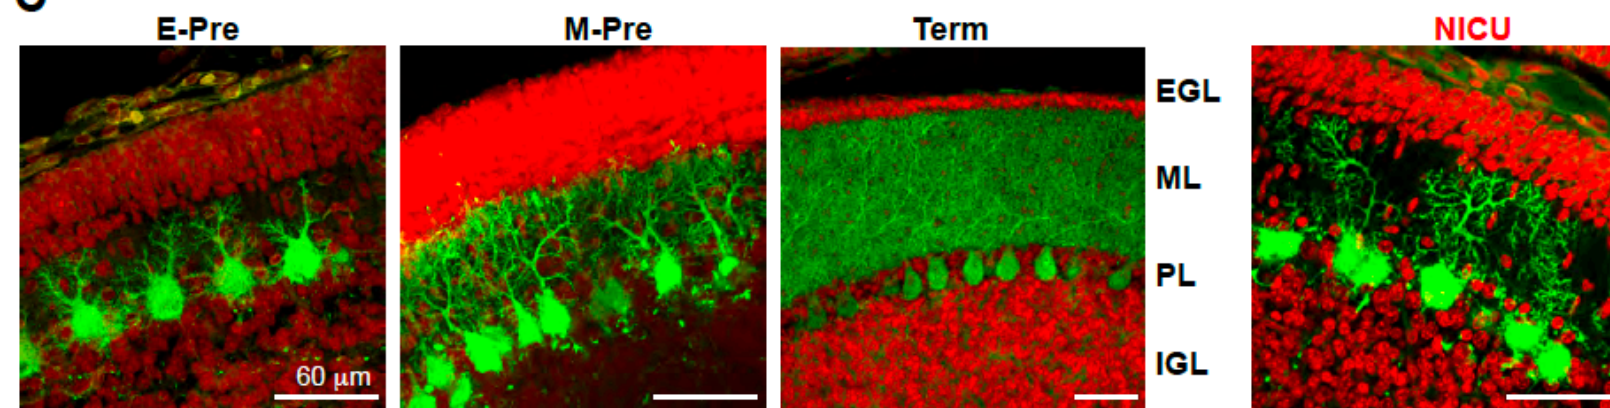

**D**

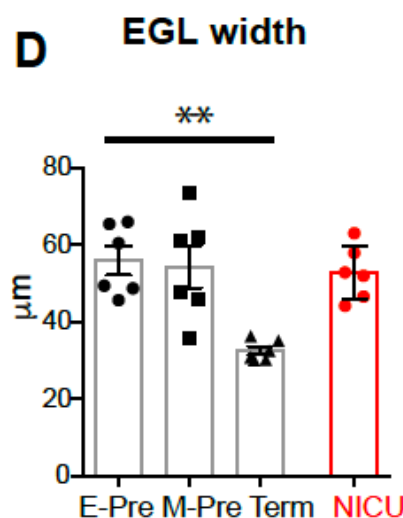

**E**

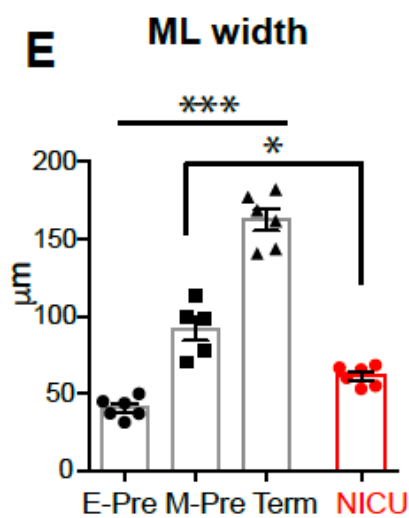

**F**

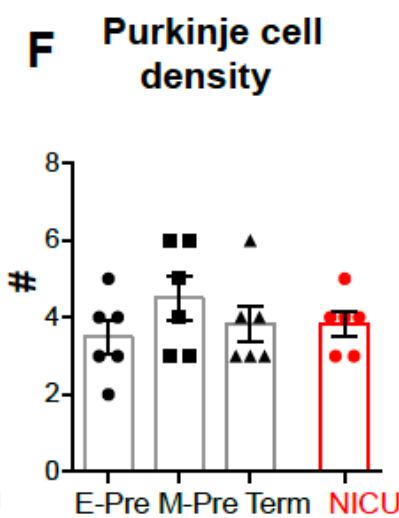

**G**

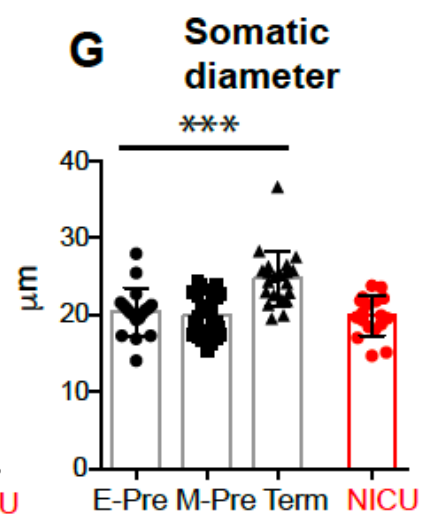

**Figure 1**

**Figure 1. Morphological development of baboon cerebellum during the last trimester of the pregnancy.** **A.** Experimental paradigm comparing baboon gestational age (GA) compared to human GA. **B.** Cerebellar sections from E-Pre, M-Pre, Term, and NICU animals immunostained to show Purkinje cell bodies, dendrites, and axons expressing calbindin (CB, green). **C.** Granule cell nuclei stained with DAPI (red) in the external granule layer (EGL) and internal granule layer (IGL), with CB labeling of Purkinje dendrites in the molecular layer (ML) and Purkinje cell bodies in the Purkinje layer (PL) in E-Pre, M-Pre, Term, and NICU cerebellar sections. **D-G.** Summary of EGL width (**D**), ML width (**E**), Purkinje cell density (**F**), and Purkinje cell soma diameter (**G**) at each gestational age. Data are represented as  $\pm$  SEM. \*, \*\*, and \*\*\* represent  $p < 0.05$ ,  $p < 0.01$ , and  $p < 0.001$ , respectively.

**A**

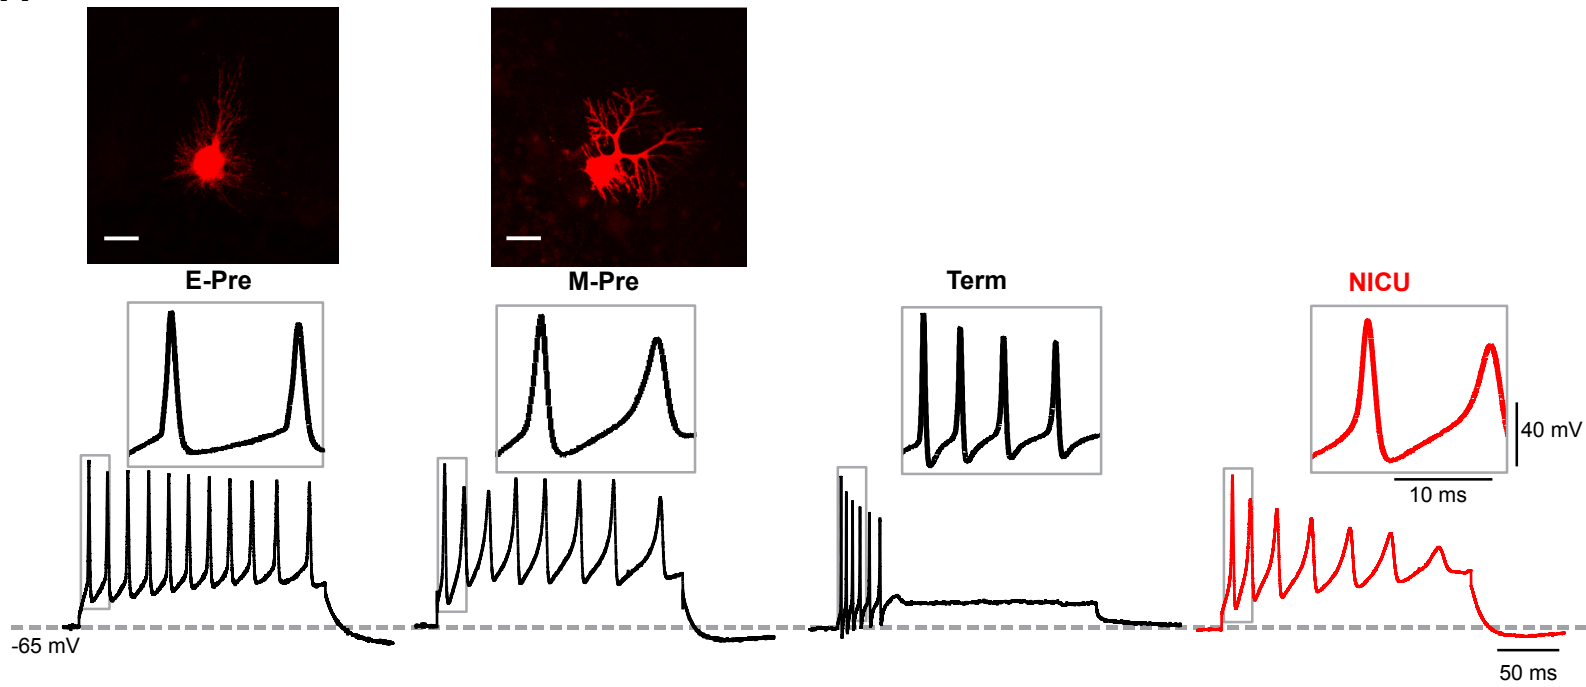

**B**

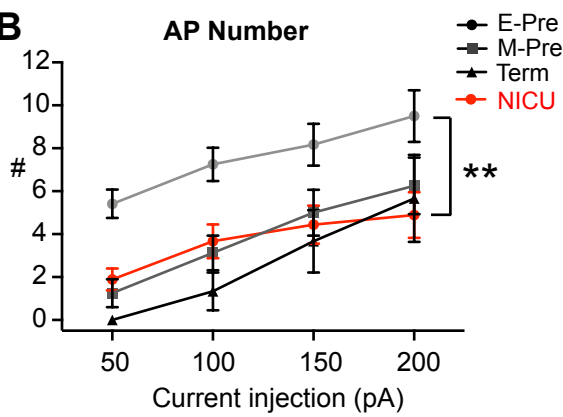

**C**

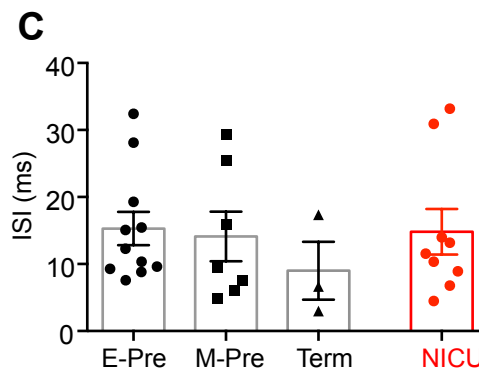

**D**

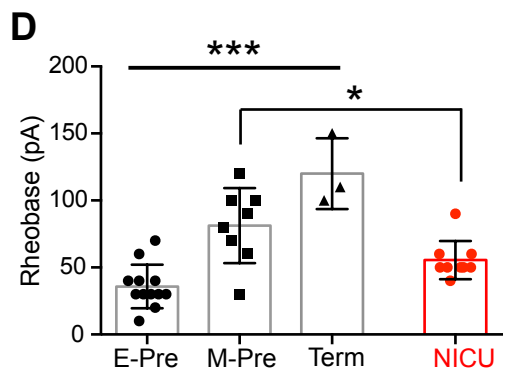

**E**

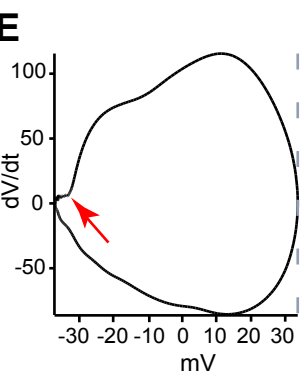

**F**

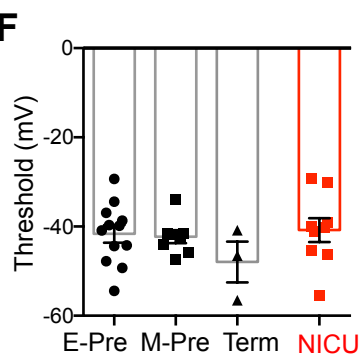

**G**

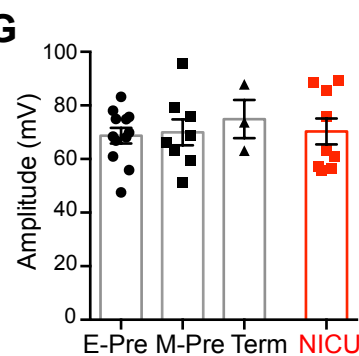

**H**

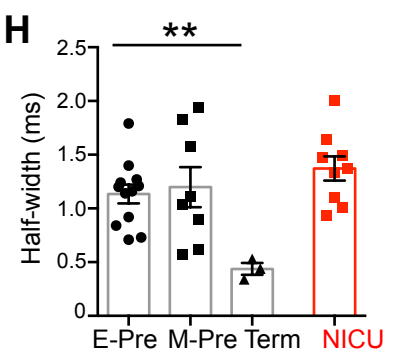

**Figure 2**

**Figure 2. Purkinje cell intrinsic properties are altered in the NICU condition. A.** Top, confocal images of Purkinje cells Alexa dye-filled during whole-cell recording. Scale = 20  $\mu$ m. Bottom, representative traces of action potentials (APs) induced by 200 pA current injections from Purkinje cells from E-Pre, M-Pre, Term, and NICU baboon neonates. Inset, expanded view of action potentials in box. **B-D.** Summary of AP number (**B**) in response to current injection from 50 to 200 pA, inter-spike interval (ISI; **C**), and rheobase (**D**) from each group. **E.** Representative phase plot of an AP ( $dV/dt$ ), demonstrating the threshold (red arrow), peak (grey line), and amplitude (voltage difference from the threshold to the peak). **F-H.** Summary of threshold (**F**), amplitude (**G**), and halfwidth (**H**) of a single AP from each gestational age. Data are represented as  $\pm$  SEM. \*, \*\*, and \*\*\* represent  $p < 0.05$ ,  $p < 0.01$ , and  $p < 0.001$ , respectively.

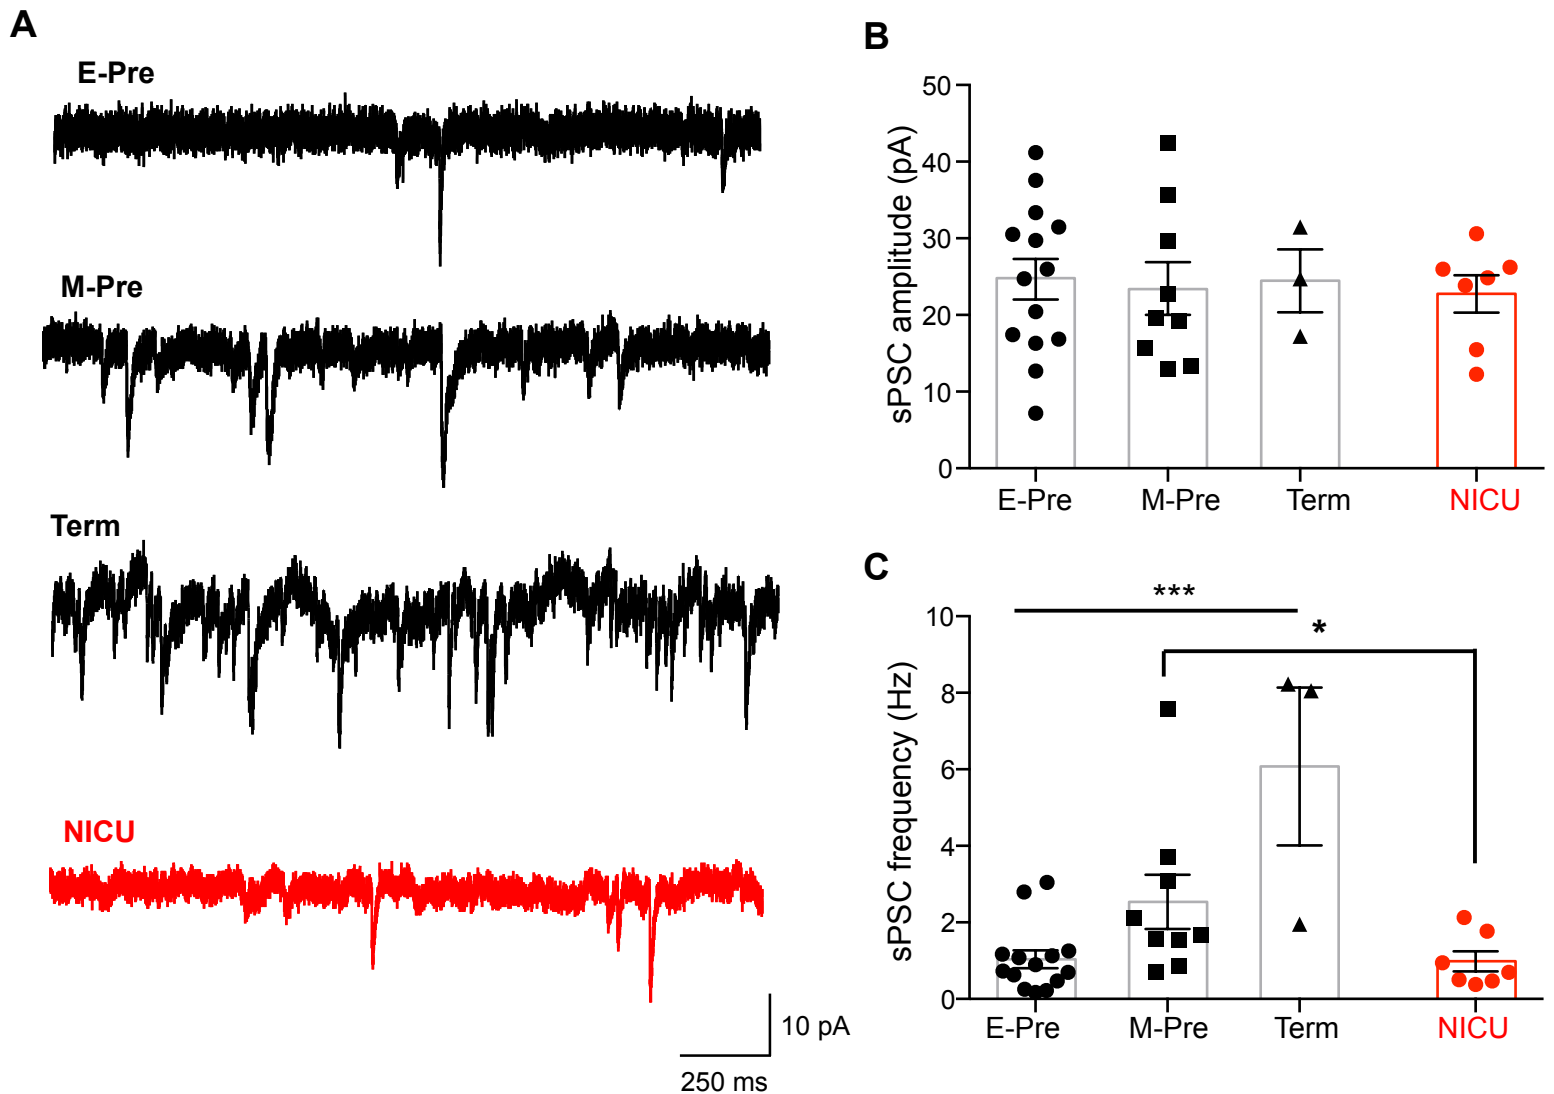

**Figure 3. Spontaneous EPSCs increase in frequency throughout gestation and are reduced after NICU experience.** **A.** Representative traces of spontaneous EPSCs recorded from Purkinje cells of E-Pre, M-Pre, Term, and NICU neonates. **B-C.** Summary of spontaneous EPSC amplitude (B) and frequency (C) at each group. Data are represented as  $\pm$  SEM. \* and \*\*\* represent  $p < 0.05$ , and  $p < 0.001$ , respectively.

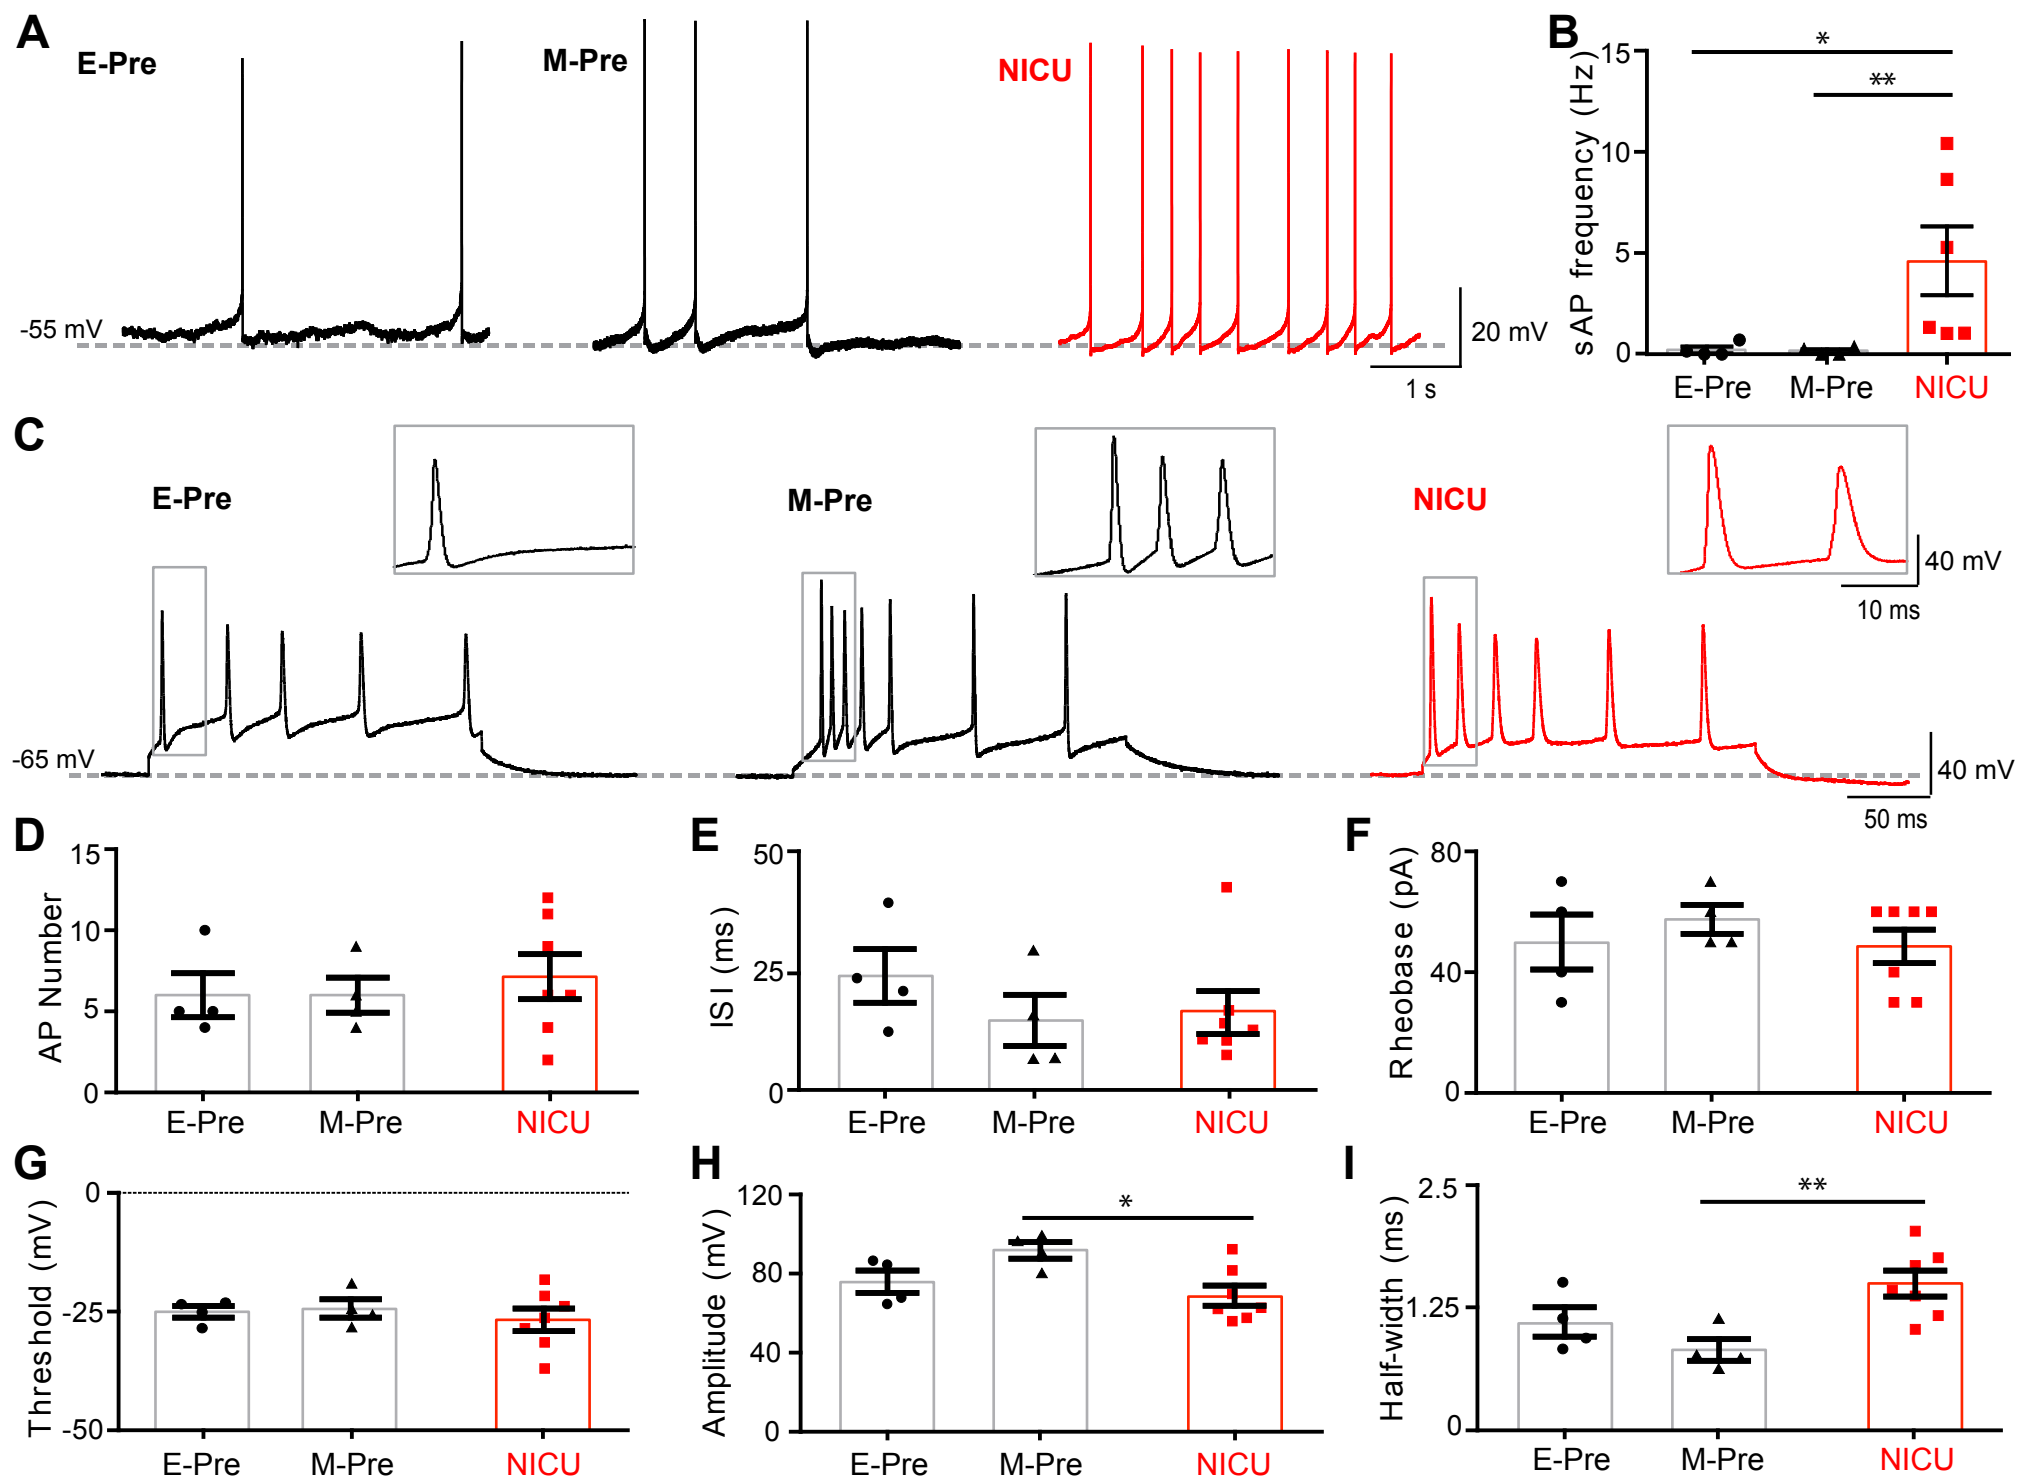

**Figure 4**

**Figure 4. DCN cell APs are impacted by NICU experience.** **A.** Spontaneous AP recordings from DCN neurons from E-Pre, M-Pre, and NICU baboon neonates. **B.** Summary of spontaneous AP frequency in DCN neurons from each group. **C.** Representative traces of action potentials induced by 200 pA current injections from DCN neurons from E-Pre, M-Pre, and NICU animals. **D-I.** Summary of DCN neuron AP number (**D**), inter-spike interval (ISI; **E**), rheobase (**F**), threshold (**G**), amplitude (**H**), and half-width (**I**) from each group. Data are represented as  $\pm$  SEM. \*, and \*\* represent  $p < 0.05$ , and  $p < 0.01$ , respectively.
